# Supplementary material
Source: PubMed Central journal article supplement (PMC1502497)
Supplement: pnas_0602187103_5.pdf [file pnas_0602187103_5.pdf]

Table 1. *B. thetaiotaomicron* genes that are regulated by the presence of *M. smithii* in vivo

| COG Category                          | COG totals<br>(Bt/Ms vs. Bt) | Gene ID                | Annotation                                                             | GeneChip                                                               |         |         |
|---------------------------------------|------------------------------|------------------------|------------------------------------------------------------------------|------------------------------------------------------------------------|---------|---------|
|                                       |                              |                        |                                                                        | Fold<br>difference                                                     | P value |         |
| Translation [J]                       | 48 up-regulated (170)*       | BT3430                 | Ribosomal protein S20                                                  | 6.5                                                                    | 5.2E-03 |         |
|                                       |                              | BT2161                 | 50S ribosomal protein L9                                               | 5.7                                                                    | 6.3E-03 |         |
|                                       |                              | BT3995                 | Alanyl-tRNA synthetase                                                 | 3.7                                                                    | 1.9E-03 |         |
|                                       |                              | BT2162                 | 30S ribosomal protein S18                                              | 3.2                                                                    | 2.3E-03 |         |
|                                       |                              | BT1669                 | Phenylalanyl-tRNA synthetase alpha chain                               | 3.1                                                                    | 7.2E-03 |         |
|                                       |                              | BT0810                 | Hypothetical protein                                                   | 3.1                                                                    | 2.2E-03 |         |
|                                       |                              | BT3877                 | 30S ribosomal protein S2 (BS1)                                         | 2.9                                                                    | 2.5E-03 |         |
|                                       |                              | BT3876                 | 30S ribosomal protein S9                                               | 2.6                                                                    | 3.2E-03 |         |
|                                       |                              | BT2163                 | 30S ribosomal protein S6                                               | 2.6                                                                    | 1.9E-03 |         |
|                                       |                              | BT3878                 | Elongation factor Ts (EF-Ts)                                           | 2.6                                                                    | 6.4E-03 |         |
|                                       |                              | BT3709                 | Elongation factor P                                                    | 2.5                                                                    | 6.1E-03 |         |
|                                       |                              | BT3875                 | 50S ribosomal protein L13                                              | 2.5                                                                    | 4.9E-03 |         |
|                                       |                              | BT2729                 | Elongation factor G                                                    | 2.5                                                                    | 5.5E-03 |         |
|                                       |                              | BT2705                 | Translation initiation factor IF-1                                     | 2.4                                                                    | 8.8E-03 |         |
|                                       |                              | BT0425                 | 50S ribosomal protein L20                                              | 2.4                                                                    | 5.7E-03 |         |
|                                       |                              | BT2004                 | RimM protein, required for 16S rRNA processing                         | 2.3                                                                    | 9.5E-03 |         |
|                                       |                              | BT2718                 | 30S ribosomal protein S17                                              | 2.3                                                                    | 1.3E-03 |         |
|                                       |                              | BT2736                 | Ribosomal protein L10                                                  | 2.3                                                                    | 6.3E-03 |         |
|                                       |                              | BT0916                 | 50S ribosomal protein L28                                              | 2.3                                                                    | 5.9E-03 |         |
|                                       |                              | BT3611                 | Glycyl-tRNA synthetase                                                 | 2.2                                                                    | 8.4E-03 |         |
|                                       |                              | BT4313                 | 50S ribosomal protein L27                                              | 2.2                                                                    | 5.5E-03 |         |
|                                       |                              | BT2727                 | 50S ribosomal protein L3                                               | 2.2                                                                    | 5.1E-03 |         |
|                                       |                              | BT2726                 | 50S ribosomal protein L4                                               | 2.2                                                                    | 6.5E-03 |         |
|                                       |                              | BT3710                 | 50S ribosomal protein L34                                              | 2.1                                                                    | 2.5E-03 |         |
|                                       |                              | BT2720                 | 50S ribosomal protein L16                                              | 2.1                                                                    | 5.8E-03 |         |
|                                       |                              | BT2737                 | 50S ribosomal protein L1                                               | 2.1                                                                    | 6.4E-03 |         |
|                                       |                              | BT2717                 | 50S ribosomal protein L14                                              | 2.0                                                                    | 3.8E-03 |         |
|                                       |                              | BT2738                 | 50S ribosomal protein L11                                              | 2.0                                                                    | 6.6E-03 |         |
|                                       |                              | BT2730                 | 30S ribosomal protein S7                                               | 2.0                                                                    | 4.8E-03 |         |
|                                       |                              | BT2731                 | 30S ribosomal protein S12                                              | 2.0                                                                    | 1.3E-03 |         |
|                                       |                              | BT4562                 | Hypothetical protein                                                   | 2.0                                                                    | 3.7E-03 |         |
|                                       |                              | BT2735                 | 50S ribosomal protein L7/L12                                           | 2.0                                                                    | 3.8E-03 |         |
|                                       |                              | BT2728                 | 30S ribosomal protein S10                                              | 2.0                                                                    | 6.8E-03 |         |
|                                       |                              | BT0872                 | Aspartyl-tRNA synthetase                                               | 2.0                                                                    | 6.4E-03 |         |
|                                       |                              | BT0915                 | 50S ribosomal protein L33                                              | 2.0                                                                    | 5.9E-03 |         |
|                                       |                              | BT4312                 | Seryl-tRNA synthetase                                                  | 1.9                                                                    | 6.6E-03 |         |
|                                       |                              | BT0423                 | Translation initiation factor IF-3                                     | 1.9                                                                    | 5.2E-03 |         |
|                                       |                              | BT3833                 | 50S ribosomal protein L32 (Ribosomal protein I)                        | 1.9                                                                    | 7.0E-03 |         |
|                                       |                              | BT1360                 | tRNA/rRNA methyltransferase                                            | 1.9                                                                    | 6.2E-05 |         |
|                                       |                              | BT0424                 | 50S ribosomal protein L35                                              | 1.8                                                                    | 3.0E-03 |         |
|                                       |                              | BT2725                 | 50S ribosomal protein L23                                              | 1.8                                                                    | 5.8E-03 |         |
|                                       |                              | BT2719                 | 50S ribosomal protein L29                                              | 1.8                                                                    | 6.2E-03 |         |
|                                       |                              | BT3772                 | Ribosomal large subunit pseudouridine synthase D                       | 1.7                                                                    | 8.1E-03 |         |
|                                       |                              | BT2716                 | 50S ribosomal protein L24                                              | 1.7                                                                    | 8.6E-03 |         |
|                                       |                              | BT2723                 | 30S ribosomal protein S19                                              | 1.7                                                                    | 9.0E-03 |         |
|                                       |                              | BT2933                 | Methionyl-tRNA synthetase                                              | 1.5                                                                    | 6.9E-03 |         |
|                                       |                              | BT3945                 | Methionyl-tRNA formyltransferase                                       | 1.5                                                                    | 3.8E-03 |         |
|                                       |                              | BT4323                 | tRNA delta(2)-isopentenylpyrophosphate transferase                     | 1.4                                                                    | 2.4E-03 |         |
|                                       |                              | 3 down-regulated (170) | BT3592                                                                 | Alpha-galactosidase precursor                                          | -1.6    | 4.8E-03 |
|                                       |                              |                        | BT3024                                                                 | Putative outer membrane protein, probably involved in nutrient binding | -1.9    | 1.2E-03 |
| BT4295                                | Putative chitinase           |                        | -2.4                                                                   | 4.3E-03                                                                |         |         |
| Coenzyme transport and metabolism [H] | 16 up-regulated (108)        | BT1763                 | Putative outer membrane protein, probably involved in nutrient binding | 11.8                                                                   | 3.0E-03 |         |
|                                       |                              | BT3226                 | Hypothetical protein                                                   | 3.6                                                                    | 6.9E-03 |         |
|                                       |                              | BT0575                 | Hypothetical protein                                                   | 2.6                                                                    | 7.1E-03 |         |
|                                       |                              | BT4560                 | Thiamine biosynthesis lipoprotein apbE precursor                       | 2.6                                                                    | 6.0E-04 |         |
|                                       |                              | BT4594                 | Putative dephospho-CoA kinase                                          | 2.5                                                                    | 2.7E-03 |         |
|                                       |                              | BT2168                 | Coproporphyrinogen III oxidase                                         | 2.1                                                                    | 7.0E-03 |         |
|                                       |                              | BT3117                 | Putative oxidoreductase                                                | 2.1                                                                    | 2.2E-03 |         |
|                                       |                              | BT1836                 | Thiamine biosynthesis protein ThiH                                     | 2.0                                                                    | 6.3E-04 |         |
|                                       |                              | BT4253                 | 6,7-dimethyl-8-ribityllumazine synthase                                | 1.9                                                                    | 5.7E-03 |         |
|                                       |                              | BT4216                 | Ubiquinone/menaquinone biosynthesis                                    | 1.8                                                                    | 1.2E-04 |         |
|                                       |                              | BT4563                 | Hypothetical protein                                                   | 1.8                                                                    | 3.6E-03 |         |

|                                                  |                         |        |                                                                                 |      |         |
|--------------------------------------------------|-------------------------|--------|---------------------------------------------------------------------------------|------|---------|
|                                                  |                         | BT2011 | Putative nicotinate-nucleotide adenyltransferase                                | 1.8  | 7.7E-03 |
|                                                  |                         | BT4258 | Putative 5-formyltetrahydrofolate cyclo-ligase                                  | 1.7  | 8.4E-03 |
|                                                  |                         | BT0891 | Dihydroorotate dehydrogenase electron transfer                                  | 1.6  | 2.5E-03 |
|                                                  |                         | BT3918 | Pyridoxal phosphate biosynthetic protein pdxJ                                   | 1.5  | 8.2E-03 |
|                                                  |                         | BT2396 | Putative membrane transporter involved in nicotinamide mononucleotide transport | 1.5  | 5.3E-03 |
|                                                  | 4 down-regulated (108)  | BT2238 | Putative biotin--(acetyl-CoA carboxylase) synthetase                            | -1.3 | 5.7E-03 |
|                                                  |                         | BT1403 | 1-deoxy-D-xylulose 5-phosphate synthase                                         | -1.4 | 7.5E-03 |
|                                                  |                         | BT0343 | Methylcobamide:CoM methyltransferase mtbA                                       | -1.5 | 9.6E-03 |
|                                                  |                         | BT4298 | Putative outer membrane protein, probably involved in nutrient binding          | -2.5 | 1.6E-03 |
| <b>Cell motility [N]</b>                         | 1 up-regulated (21)     | BT4219 | Hypothetical protein                                                            | 1.9  | 8.1E-05 |
|                                                  | 1 down-regulated (21)   | BT0345 | Hypothetical protein                                                            | -1.6 | 2.0E-03 |
| <b>Defense mechanisms [V]</b>                    | 4 up-regulated (105)    | BT1600 | BexA, membrane proein                                                           | 1.8  | 5.6E-03 |
|                                                  |                         | BT3119 | Chloramphenicol acetyltransferase                                               | 1.8  | 1.5E-03 |
|                                                  |                         | BT4318 | ATP-binding protein                                                             | 1.7  | 9.2E-03 |
|                                                  |                         | BT4507 | Beta-lactamase precursor                                                        | 1.4  | 2.1E-03 |
|                                                  | 5 down-regulated (105)  | BT0300 | Cation efflux system (AcrB/AcrD/AcrF family)                                    | -1.4 | 7.8E-03 |
|                                                  |                         | BT2377 | Cation efflux pump                                                              | -1.4 | 6.3E-03 |
|                                                  |                         | BT2118 | Transporter, AcrB/D/F family                                                    | -1.6 | 3.7E-03 |
|                                                  |                         | BT4408 | Hypothetical protein                                                            | -1.7 | 9.3E-04 |
|                                                  |                         | BT4627 | DNA modification methylase                                                      | -1.7 | 6.3E-03 |
| <b>Cell wall/membrane bioogenesis [M]</b>        | 15 up-regulated (357)   | BT1370 | NAD dependent nucleotide-diphosphate-sugar epimerase                            | 2.6  | 1.2E-04 |
|                                                  |                         | BT0829 | UDP-glucose 6-dehydrogenase                                                     | 2.5  | 6.0E-03 |
|                                                  |                         | BT1730 | Putative dTDP-4-dehydrorhamnose reductase                                       | 2.5  | 7.1E-03 |
|                                                  |                         | BT2937 | Putative glycosyltransferase                                                    | 2.4  | 1.3E-03 |
|                                                  |                         | BT3814 | Rod shape-determining protein                                                   | 2.4  | 1.6E-03 |
|                                                  |                         | BT2798 | Carboxy-terminal processing protease precursor                                  | 2.4  | 2.9E-03 |
|                                                  |                         | BT1613 | Hypothetical protein                                                            | 2.0  | 4.8E-03 |
|                                                  |                         | BT3118 | Prolipoprotein diacylglycerol transferase                                       | 1.9  | 6.8E-03 |
|                                                  |                         | BT2944 | Putative UDP-N-acetylglucosamine 2-epimerase                                    | 1.9  | 1.6E-03 |
|                                                  |                         | BT4283 | Hypothetical protein                                                            | 1.7  | 1.9E-03 |
|                                                  |                         | BT3372 | Glycosyltransferase                                                             | 1.6  | 8.0E-03 |
|                                                  |                         | BT3376 | Nucleotide sugar transaminase                                                   | 1.5  | 4.4E-03 |
|                                                  |                         | BT4703 | Chloromuconate cycloisomerase                                                   | 1.4  | 5.7E-03 |
|                                                  |                         | BT1608 | Capsule biosynthesis protein capA                                               | 1.4  | 8.7E-03 |
|                                                  |                         | BT3996 | Putative peptidase                                                              | 1.4  | 6.3E-03 |
|                                                  | 18 down-regulated (357) | BT1194 | Outer membrane protein, OmpA family                                             | -1.3 | 6.5E-03 |
|                                                  |                         | BT4129 | Outer membrane assembly protein                                                 | -1.3 | 4.9E-03 |
|                                                  |                         | BT3905 | Putative alkaline protease aprF                                                 | -1.4 | 7.2E-03 |
|                                                  |                         | BT4410 | Hypothetical protein                                                            | -1.4 | 9.1E-03 |
|                                                  |                         | BT2665 | TonB                                                                            | -1.5 | 3.4E-03 |
|                                                  |                         | BT2927 | Conserved hypothetical protein, putative cell wall-associated protein precursor | -1.5 | 8.8E-04 |
|                                                  |                         | BT1313 | Muconate cycloisomerase                                                         | -1.5 | 2.7E-03 |
|                                                  |                         | BT1550 | Hypothetical protein                                                            | -1.5 | 8.2E-03 |
|                                                  |                         | BT1213 | Periplasmic component of efflux system                                          | -1.5 | 7.9E-03 |
|                                                  |                         | BT3026 | Glycosylhydrolase, putative xylanase                                            | -1.5 | 2.3E-03 |
|                                                  |                         | BT4153 | Exopolygalacturonase precursor                                                  | -1.5 | 2.9E-03 |
|                                                  |                         | BT4304 | Putative glycosyltransferase                                                    | -1.6 | 7.1E-03 |
|                                                  |                         | BT2117 | Outer membrane protein, putative                                                | -1.6 | 1.9E-03 |
|                                                  |                         | BT0610 | Lipopolysaccharide biosynthesis protein, putative glycosyltransferase           | -1.7 | 1.6E-03 |
|                                                  |                         | BT0813 | TonB                                                                            | -1.7 | 8.7E-04 |
|                                                  |                         | BT0669 | Putative cation efflux system protein                                           | -1.8 | 2.9E-03 |
|                                                  |                         | BT2086 | Choloylglycine hydrolase                                                        | -1.8 | 6.0E-03 |
|                                                  |                         | BT2762 | TonB                                                                            | -1.9 | 4.6E-03 |
| <b>Replication, recombination and repair [L]</b> | 12 up-regulated (278)   | BT1499 | DNA-binding protein HU                                                          | 2.6  | 1.7E-03 |
|                                                  |                         | BT2143 | Chromosomal replication initiator protein dnaA                                  | 2.5  | 2.8E-03 |
|                                                  |                         | BT3979 | Putative methyltransferase                                                      | 2.4  | 7.3E-04 |
|                                                  |                         | BT2236 | Hypothetical protein                                                            | 1.9  | 7.3E-03 |
|                                                  |                         | BT3255 | Putative N6-adenine-specific DNA methylase                                      | 1.9  | 5.6E-03 |
|                                                  |                         | BT3938 | ATP-dependent DNA helicase recQ                                                 | 1.8  | 4.5E-03 |
|                                                  |                         | BT3478 | Integrase                                                                       | 1.8  | 2.3E-03 |
|                                                  |                         | BT1671 | Endonuclease III                                                                | 1.6  | 4.5E-03 |
|                                                  |                         | BT0570 | Excinuclease ABC subunit B                                                      | 1.5  | 3.3E-03 |
|                                                  |                         | BT0419 | Putative endonuclease                                                           | 1.5  | 6.2E-04 |
|                                                  |                         | BT0578 | Excinuclease ABC subunit A                                                      | 1.4  | 4.5E-03 |
|                                                  |                         | BT2056 | Hypothetical protein                                                            | 1.2  | 7.2E-03 |

|                                                                         |                         |        |                                                                               |      |         |
|-------------------------------------------------------------------------|-------------------------|--------|-------------------------------------------------------------------------------|------|---------|
|                                                                         | 17 down-regulated (278) | BT2272 | Hypothetical protein                                                          | -1.3 | 4.4E-03 |
|                                                                         |                         | BT4343 | Hypothetical protein                                                          | -1.4 | 4.6E-03 |
|                                                                         |                         | BT1509 | Integrase                                                                     | -1.5 | 6.1E-03 |
|                                                                         |                         | BT1411 | Methylated-DNA--protein-cysteine methyltransferase                            | -1.5 | 4.0E-03 |
|                                                                         |                         | BT2294 | Conserved protein found in conjugate transposon                               | -1.5 | 6.4E-03 |
|                                                                         |                         | BT0615 | Hypothetical protein                                                          | -1.6 | 4.8E-03 |
|                                                                         |                         | BT3860 | Hypothetical protein                                                          | -1.6 | 3.9E-03 |
|                                                                         |                         | BT2830 | DNA-binding protein HU-beta                                                   | -1.6 | 5.2E-04 |
|                                                                         |                         | BT2488 | Integrase                                                                     | -1.6 | 2.8E-03 |
|                                                                         |                         | BT0291 | Integrase                                                                     | -1.7 | 3.4E-04 |
|                                                                         |                         | BT2349 | Transposase                                                                   | -1.7 | 6.8E-04 |
|                                                                         |                         | BT4469 | Hypothetical protein                                                          | -1.7 | 1.7E-03 |
|                                                                         |                         | BT3020 | Hypothetical protein                                                          | -1.8 | 4.7E-03 |
|                                                                         |                         | BT0795 | Hypothetical protein                                                          | -1.8 | 1.7E-03 |
|                                                                         |                         | BT1424 | Hypothetical protein                                                          | -1.9 | 4.3E-03 |
|                                                                         |                         | BT4021 | Integrase                                                                     | -2.0 | 5.5E-04 |
|                                                                         |                         | BT1980 | Transposase                                                                   | -2.4 | 1.7E-04 |
| <b>Nucleotide transport and metabolism [F]</b>                          | 13 up-regulated (80)    | BT4582 | Amidophosphoribosyltransferase precursor                                      | 4.8  | 6.9E-03 |
|                                                                         |                         | BT4387 | Adenylate kinase (ATP-AMP transphosphatase)                                   | 3.1  | 2.3E-03 |
|                                                                         |                         | BT0748 | Ribose-phosphate pyrophosphokinase                                            | 3.1  | 4.6E-03 |
|                                                                         |                         | BT2791 | Uracil phosphoribosyltransferase                                              | 3.0  | 4.7E-03 |
|                                                                         |                         | BT3989 | Hypothetical protein                                                          | 2.6  | 1.0E-04 |
|                                                                         |                         | BT3267 | Adenine phosphoribosyltransferase                                             | 2.4  | 1.5E-03 |
|                                                                         |                         | BT2145 | Ribonucleoside-diphosphate reductase alpha chain                              | 2.1  | 7.8E-03 |
|                                                                         |                         | BT0651 | Thiamine biosynthesis protein ThiG                                            | 2.1  | 6.0E-03 |
|                                                                         |                         | BT1733 | Putative phosphoribosylformylglycinamide synthase                             | 2.1  | 4.1E-03 |
|                                                                         |                         | BT0590 | CTP synthase (UTP-ammonia ligase)                                             | 2.0  | 4.8E-03 |
|                                                                         |                         | BT4217 | Phosphoribosylamidoimidazole-succinocarboxamide synthase                      | 1.9  | 3.2E-04 |
|                                                                         |                         | BT0686 | Putative uracil permease (uracil transporter)                                 | 1.7  | 2.2E-03 |
|                                                                         |                         | BT2060 | Cytidylate kinase                                                             | 1.5  | 6.2E-03 |
|                                                                         |                         | BT2527 | Uridine kinase (uridine monophosphokinase)                                    | -1.4 | 4.1E-03 |
|                                                                         |                         | BT2566 | HIT family protein                                                            | -1.4 | 8.7E-03 |
|                                                                         |                         | BT0888 | AMP nucleosidase                                                              | -1.5 | 1.1E-03 |
|                                                                         |                         | BT1588 | Hypothetical protein                                                          | -1.5 | 3.4E-03 |
| <b>Secondary metabolites biosynthesis, transport and catabolism [Q]</b> | 1 up-regulated (31)     | BT3771 | 3-oxoacyl-[acyl-carrier protein] reductase                                    | 1.5  | 6.6E-04 |
|                                                                         | 2 down-regulated (31)   | BT0199 | Hypothetical protein                                                          | -1.7 | 3.7E-03 |
|                                                                         |                         | BT2692 | Imidazolonepropionase                                                         | -2.0 | 6.0E-03 |
| <b>Intracellular trafficking and secretion [U]</b>                      | 3 up-regulated (54)     | BT1601 | Putative signal recognition protein                                           | 2.6  | 7.9E-03 |
|                                                                         |                         | BT2835 | Protein-export membrane protein SecD/SecE                                     | 2.3  | 1.9E-03 |
|                                                                         |                         | BT4103 | Putative Sec-independent protein translocase                                  | 1.5  | 3.3E-03 |
|                                                                         | 4 down-regulated (54)   | BT2668 | MotA/TolQ/ExbB proton channel                                                 | -1.7 | 9.8E-05 |
|                                                                         |                         | BT1108 | Conserved hypothetical protein, putative integral membrane protein            | -1.9 | 6.0E-03 |
|                                                                         |                         | BT1072 | Hypothetical protein                                                          | -2.0 | 1.8E-03 |
|                                                                         |                         | BT3347 | Hypothetical protein                                                          | -2.2 | 6.2E-03 |
| <b>Lipid transport and metabolism [I]</b>                               | 8 up-regulated (70)     | BT3358 | 3-oxoacyl-[acyl-carrier-protein] synthase II                                  | 2.6  | 2.9E-03 |
|                                                                         |                         | BT1526 | Myo-inositol-1-phosphate synthase                                             | 2.2  | 1.2E-03 |
|                                                                         |                         | BT1523 | CDP-diacylglycerol-inositol 3-phosphatidyltransferase                         | 2.1  | 9.4E-03 |
|                                                                         |                         | BT3834 | 3-oxoacyl-[acyl-carrier-protein] synthase III                                 | 1.9  | 4.3E-03 |
|                                                                         |                         | BT3884 | 2-C-methyl-D-erythritol 2,4-cyclodiphosphate synthase                         | 1.7  | 1.3E-03 |
|                                                                         |                         | BT4322 | Conserved hypothetical protein, with a diacylglycerol kinase catalytic domain | 1.6  | 5.6E-04 |
|                                                                         |                         | BT0122 | 3-oxoacyl-[acyl-carrier-protein] synthase III                                 | 1.6  | 9.8E-03 |
|                                                                         |                         | BT1806 | Acyl-CoA dehydrogenase                                                        | 1.6  | 8.1E-05 |
|                                                                         | 6 down-regulated (70)   | BT3978 | Putative cardiolipin synthetase                                               | -1.3 | 2.4E-03 |
|                                                                         |                         | BT0260 | Acyltransferase family protein                                                | -1.3 | 6.5E-03 |
|                                                                         |                         | BT0135 | Hypothetical protein                                                          | -1.4 | 6.1E-03 |
|                                                                         |                         | BT1449 | Biotin carboxylase                                                            | -2.3 | 5.1E-03 |
|                                                                         |                         | BT0316 | Putative hemin receptor                                                       | -2.3 | 2.4E-03 |
|                                                                         |                         | BT1450 | Propionyl-CoA carboxylase beta chain                                          | -2.5 | 4.1E-03 |
| <b>Amino acid transport and metabolism [E]</b>                          | 12 up-regulated (209)   | BT3866 | Glutamine-dependent carbamyl phosphate synthetase                             | 3.7  | 2.0E-03 |
|                                                                         |                         | BT1288 | Spermidine/putrescine ABC transporter                                         | 3.3  | 7.4E-03 |
|                                                                         |                         | BT3760 | Argininosuccinate synthase                                                    | 2.8  | 5.0E-03 |
|                                                                         |                         | BT3759 | N-acetyl-gamma-glutamyl-phosphate reductase                                   | 2.7  | 4.9E-03 |

|                                      |                         |                         |                                                                                  |                                 |         |         |
|--------------------------------------|-------------------------|-------------------------|----------------------------------------------------------------------------------|---------------------------------|---------|---------|
|                                      |                         | BT2834                  | Peptidyl-dipeptidase                                                             | 2.2                             | 4.1E-03 |         |
|                                      |                         | BT4215                  | Shikimate 5-dehydrogenase                                                        | 2.2                             | 6.8E-05 |         |
|                                      |                         | BT0569                  | Hypothetical protein                                                             | 2.0                             | 5.1E-04 |         |
|                                      |                         | BT4257                  | Putative histidinol-phosphatase                                                  | 2.0                             | 2.4E-03 |         |
|                                      |                         | BT3395                  | Putative acetylglutamate kinase                                                  | 1.9                             | 9.8E-04 |         |
|                                      |                         | BT0457                  | Sialic acid-specific 9-O-acetyltransferase                                       | 1.7                             | 3.5E-03 |         |
|                                      |                         | BT0674                  | Carboxynorspermidine decarboxylase                                               | 1.6                             | 3.0E-03 |         |
|                                      |                         | BT1789                  | Aminopeptidase C (bleomycin hydrolase)                                           | 1.3                             | 8.6E-03 |         |
|                                      | 18 down-regulated (209) | BT4584                  | Putative aminomethyltransferase                                                  | -1.4                            | 9.3E-03 |         |
|                                      |                         | BT2522                  | Xaa-Pro aminopeptidase                                                           | -1.5                            | 2.8E-03 |         |
|                                      |                         | BT4424                  | Sorbitol dehydrogenase                                                           | -1.5                            | 7.1E-03 |         |
|                                      |                         | BT4150                  | Putative rhamnogalacturonan acetyltransferase                                    | -1.5                            | 8.7E-03 |         |
|                                      |                         | BT4412                  | Hypothetical protein                                                             | -1.5                            | 3.9E-03 |         |
|                                      |                         | BT4502                  | Hypothetical protein                                                             | -1.5                            | 4.5E-04 |         |
|                                      |                         | BT2621                  | Hypothetical protein                                                             | -1.7                            | 1.3E-03 |         |
|                                      |                         | BT4078                  | Hypothetical protein                                                             | -1.8                            | 2.3E-03 |         |
|                                      |                         | BT2691                  | Methenyltetrahydrofolate cyclohydrolase                                          | -1.9                            | 2.1E-03 |         |
|                                      |                         | BT1743                  | Hypothetical protein                                                             | -1.9                            | 3.5E-04 |         |
|                                      |                         | BT2404                  | L-asparaginase I                                                                 | -2.0                            | 6.4E-03 |         |
|                                      |                         | BT1064                  | Hypothetical protein                                                             | -2.0                            | 8.0E-04 |         |
|                                      |                         | BT1492                  | Tyrosine phenol-lyase                                                            | -2.0                            | 3.1E-03 |         |
|                                      |                         | BT3734                  | Oxidoreductase                                                                   | -2.1                            | 3.4E-03 |         |
|                                      |                         | BT2690                  | Histidine ammonia-lyase                                                          | -2.3                            | 9.9E-03 |         |
|                                      |                         | BT2693                  | Formiminotransferase-cyclodeaminase                                              | -2.6                            | 1.7E-03 |         |
|                                      |                         | BT2694                  | Putative urocanate hydratase                                                     | -3.0                            | 1.5E-04 |         |
|                                      |                         | BT1554                  | Alanine dehydrogenase                                                            | -3.5                            | 5.0E-05 |         |
| General function prediction only [R] | 32 up-regulated (394)   | BT3220                  | TPR-repeat-containing protein                                                    | 5.6                             | 6.2E-04 |         |
|                                      |                         | BT2160                  | Putative regulatory protein                                                      | 3.0                             | 8.8E-03 |         |
|                                      |                         | BT4388                  | GTP-binding protein                                                              | 3.0                             | 8.4E-03 |         |
|                                      |                         | BT4595                  | Hypothetical protein                                                             | 2.9                             | 6.6E-04 |         |
|                                      |                         | BT3373                  | Spermidine n1-acetyltransferase                                                  | 2.8                             | 2.4E-04 |         |
|                                      |                         | BT2035                  | Putative ABC transporter ATP-binding protein                                     | 2.6                             | 2.2E-03 |         |
|                                      |                         | BT2542                  | Putative haloacid dehalogenase-like hydrolase                                    | 2.6                             | 1.3E-03 |         |
|                                      |                         | BT0883                  | Hypothetical protein                                                             | 2.5                             | 3.7E-03 |         |
|                                      |                         | BT4339                  | Glutamine synthetase                                                             | 2.4                             | 5.9E-03 |         |
|                                      |                         | BT0822                  | Putative metallo-beta-lactamase superfamily hydrolase                            | 2.4                             | 4.7E-03 |         |
|                                      |                         | BT3730                  | Putative regulatory protein                                                      | 2.3                             | 6.5E-04 |         |
|                                      |                         | BT4320                  | Putative zinc protease                                                           | 2.0                             | 1.3E-03 |         |
|                                      |                         | BT4254                  | Hypothetical protein                                                             | 2.0                             | 5.6E-03 |         |
|                                      |                         | BT0334                  | Hypothetical protein                                                             | 1.8                             | 3.2E-03 |         |
|                                      |                         | BT1229                  | Conserved hypothetical protein, putative membrane protein                        | 1.7                             | 8.6E-03 |         |
|                                      |                         | BT4369                  | Hypothetical protein                                                             | 1.7                             | 9.0E-03 |         |
|                                      |                         | BT2417                  | Hypothetical protein                                                             | 1.7                             | 3.5E-03 |         |
|                                      |                         | BT1186                  | ABC transporter ATP-binding protein                                              | 1.6                             | 3.2E-03 |         |
|                                      |                         | BT2832                  | Rhomboid family protein                                                          | 1.6                             | 8.1E-03 |         |
|                                      |                         | BT3837                  | ABC transporter ATP-binding protein                                              | 1.6                             | 3.4E-04 |         |
|                                      |                         | BT4315                  | HPr(Ser) phosphatase                                                             | 1.6                             | 6.2E-03 |         |
|                                      |                         | BT2134                  | Putative HD superfamily hydrolase                                                | 1.6                             | 4.1E-03 |         |
|                                      |                         | BT3405                  | Hypothetical protein                                                             | 1.6                             | 7.0E-03 |         |
|                                      |                         | BT4214                  | Hypothetical protein                                                             | 1.6                             | 7.4E-03 |         |
|                                      |                         | BT0766                  | Hypothetical protein                                                             | 1.5                             | 5.5E-04 |         |
|                                      |                         | BT2207                  | Putative ATPase/GTPase                                                           | 1.5                             | 1.6E-03 |         |
|                                      |                         | BT3459                  | Hemolysin A                                                                      | 1.5                             | 9.6E-04 |         |
|                                      |                         | BT1666                  | Hydrolase, haloacid dehalogenase-like hydrolase                                  | 1.5                             | 2.4E-03 |         |
|                                      |                         | BT4346                  | Conserved hypothetical protein, with a Metallo-beta-lactamase superfamily domain | 1.4                             | 1.5E-03 |         |
|                                      |                         | BT2018                  | Hypothetical protein                                                             | 1.4                             | 5.9E-03 |         |
|                                      |                         | BT0774                  | Conserved protein with a conserved patatin-like phospholipase domain             | 1.4                             | 7.4E-03 |         |
|                                      |                         | BT1851                  | TPR-repeat-containing protein                                                    | 1.3                             | 1.4E-03 |         |
|                                      |                         | 36 down-regulated (394) | BT2371                                                                           | Putative protease/amidase       | -1.2    | 6.0E-03 |
|                                      |                         |                         | BT3432                                                                           | Hypothetical protein            | -1.3    | 7.6E-03 |
|                                      |                         |                         | BT4509                                                                           | Hypothetical protein            | -1.4    | 3.8E-03 |
|                                      |                         |                         | BT0278                                                                           | Hypothetical protein            | -1.4    | 9.2E-03 |
|                                      |                         |                         | BT0168                                                                           | Hypothetical protein            | -1.4    | 3.9E-03 |
|                                      |                         |                         | BT2384                                                                           | Acetyltransferase               | -1.4    | 9.5E-03 |
|                                      |                         |                         | BT2209                                                                           | Putative nucleotidyltransferase | -1.5    | 9.5E-03 |
|                                      |                         |                         | BT2385                                                                           | Hypothetical protein            | -1.5    | 8.1E-03 |

|                                                                         |                                                               |                                             |                                                                                                       |        |                                                               |     |         |
|-------------------------------------------------------------------------|---------------------------------------------------------------|---------------------------------------------|-------------------------------------------------------------------------------------------------------|--------|---------------------------------------------------------------|-----|---------|
|                                                                         |                                                               | BT3023                                      | Hypothetical protein                                                                                  | -1.5   | 1.4E-03                                                       |     |         |
|                                                                         |                                                               | BT3401                                      | Hypothetical protein                                                                                  | -1.5   | 6.2E-03                                                       |     |         |
|                                                                         |                                                               | BT0585                                      | Hypothetical protein                                                                                  | -1.5   | 8.1E-04                                                       |     |         |
|                                                                         |                                                               | BT4556                                      | Hypothetical protein                                                                                  | -1.5   | 2.7E-03                                                       |     |         |
|                                                                         |                                                               | BT4140                                      | Hypothetical protein                                                                                  | -1.5   | 2.9E-03                                                       |     |         |
|                                                                         |                                                               | BT1707                                      | Hypothetical protein                                                                                  | -1.6   | 1.5E-03                                                       |     |         |
|                                                                         |                                                               | BT1894                                      | TPR-repeat-containing proteins                                                                        | -1.6   | 2.8E-03                                                       |     |         |
|                                                                         |                                                               | BT0057                                      | Hypothetical protein                                                                                  | -1.6   | 4.8E-03                                                       |     |         |
|                                                                         |                                                               | BT1263                                      | Putative protease I                                                                                   | -1.6   | 1.5E-03                                                       |     |         |
|                                                                         |                                                               | BT0164                                      | Hypothetical protein                                                                                  | -1.6   | 5.7E-03                                                       |     |         |
|                                                                         |                                                               | BT1839                                      | Hypothetical protein                                                                                  | -1.6   | 5.5E-03                                                       |     |         |
|                                                                         |                                                               | BT0479                                      | Putative glycosyltransferase                                                                          | -1.6   | 2.1E-03                                                       |     |         |
|                                                                         |                                                               | BT2756                                      | Anaerobic C4-dicarboxylate transporter dcuB                                                           | -1.7   | 7.3E-03                                                       |     |         |
|                                                                         |                                                               | BT3467                                      | Putative glycosylhydrolase                                                                            | -1.7   | 8.3E-04                                                       |     |         |
|                                                                         |                                                               | BT0448                                      | Hypothetical protein                                                                                  | -1.7   | 3.1E-03                                                       |     |         |
|                                                                         |                                                               | BT4108                                      | Hypothetical protein                                                                                  | -1.7   | 7.0E-03                                                       |     |         |
|                                                                         |                                                               | BT1016                                      | Conserved protein with a conserved patatin-like phospholipase domain                                  | -1.7   | 8.7E-03                                                       |     |         |
|                                                                         |                                                               | BT1924                                      | Putative metal-dependent hydrolase                                                                    | -1.7   | 4.0E-04                                                       |     |         |
|                                                                         |                                                               | BT2174                                      | ABC transporter ATP-binding protein                                                                   | -1.7   | 2.7E-03                                                       |     |         |
|                                                                         |                                                               | BT2769                                      | Putative serine/threonine-protein kinase pknB                                                         | -1.7   | 4.6E-03                                                       |     |         |
|                                                                         |                                                               | BT0163                                      | Hypothetical protein                                                                                  | -1.7   | 1.7E-04                                                       |     |         |
|                                                                         |                                                               | BT2771                                      | Putative serine/threonine-protein kinase pknB                                                         | -1.8   | 8.5E-03                                                       |     |         |
|                                                                         |                                                               | BT3947                                      | Competence protein                                                                                    | -1.8   | 3.6E-03                                                       |     |         |
|                                                                         |                                                               | BT1383                                      | Oxidoreductase, aldo/keto reductase                                                                   | -1.9   | 1.8E-04                                                       |     |         |
|                                                                         |                                                               | BT0673                                      | NADP(H) oxidoreductase                                                                                | -1.9   | 5.0E-03                                                       |     |         |
|                                                                         |                                                               | BT0187                                      | Hypothetical protein                                                                                  | -1.9   | 2.6E-03                                                       |     |         |
|                                                                         |                                                               | BT2434                                      | Pyridine nucleotide-disulphide oxidoreductase                                                         | -2.0   | 1.3E-03                                                       |     |         |
|                                                                         |                                                               | BT0755                                      | Hypothetical protein                                                                                  | -2.2   | 1.9E-04                                                       |     |         |
| <b>Posttranslational modification, protein turnover, chaperones [O]</b> | 14 up-regulated (107)                                         | BT3841                                      | FKBP-type peptidyl-prolyl cis-trans isomerase (trigger factor)                                        | 3.9    | 6.2E-03                                                       |     |         |
|                                                                         |                                                               | BT0897                                      | Chaperone protein htpG (heat shock protein htpG)                                                      | 2.4    | 5.1E-03                                                       |     |         |
|                                                                         |                                                               | BT2977                                      | Peptidylprolyl isomerase                                                                              | 2.3    | 1.5E-03                                                       |     |         |
|                                                                         |                                                               | BT4371                                      | Peptidyl-prolyl cis-trans isomerase                                                                   | 2.2    | 4.5E-03                                                       |     |         |
|                                                                         |                                                               | BT3612                                      | Putative FKBP-type peptidyl-prolyl cis-trans isomerase fkpA                                           | 2.2    | 6.0E-03                                                       |     |         |
|                                                                         |                                                               | BT1829                                      | 60 kDa chaperonin (groEL)                                                                             | 2.1    | 2.3E-03                                                       |     |         |
|                                                                         |                                                               | BT2976                                      | FKBP-type peptidyl-prolyl cis-trans isomerase, outer membrane protein precursor                       | 2.0    | 7.2E-03                                                       |     |         |
|                                                                         |                                                               | BT0920                                      | Putative O-sialoglycoprotein endopeptidase                                                            | 1.8    | 5.0E-03                                                       |     |         |
|                                                                         |                                                               | BT1830                                      | 10 kDa chaperonin (groES)                                                                             | 1.8    | 7.3E-03                                                       |     |         |
|                                                                         |                                                               | BT0149                                      | Peptidase                                                                                             | 1.7    | 8.4E-03                                                       |     |         |
|                                                                         |                                                               | BT1055                                      | Pyruvate formate-lyase activating enzyme                                                              | 1.6    | 2.5E-03                                                       |     |         |
|                                                                         |                                                               | BT4615                                      | Chaperone protein dnaK                                                                                | 1.6    | 9.5E-03                                                       |     |         |
|                                                                         |                                                               | BT2564                                      | Hypothetical protein                                                                                  | 1.6    | 2.1E-03                                                       |     |         |
|                                                                         |                                                               | BT3810                                      | Putative endothelin-converting enzyme                                                                 | 1.5    | 2.3E-04                                                       |     |         |
|                                                                         | 10 down-regulated (107)                                       | BT3322                                      | Putative thioredoxin family protein                                                                   | -1.3   | 7.2E-03                                                       |     |         |
|                                                                         |                                                               | BT0781                                      | Hypothetical protein                                                                                  | -1.5   | 3.2E-03                                                       |     |         |
|                                                                         |                                                               | BT3897                                      | Putative thiol:disulfide interchange protein DsbE                                                     | -1.6   | 4.5E-03                                                       |     |         |
|                                                                         |                                                               | BT2499                                      | Peptide methionine sulfoxide reductase msrA/msrB                                                      | -1.7   | 7.9E-03                                                       |     |         |
|                                                                         |                                                               | BT0987                                      | Putative cytochrome C-type biogenesis protein                                                         | -1.7   | 5.8E-03                                                       |     |         |
|                                                                         |                                                               | BT2811                                      | Alkyl hydroperoxide reductase subunit F                                                               | -1.7   | 4.5E-03                                                       |     |         |
|                                                                         |                                                               | BT4194                                      | Putative integral membrane protein                                                                    | -1.7   | 6.5E-03                                                       |     |         |
|                                                                         |                                                               | BT0565                                      | Putative heat shock protein                                                                           | -1.9   | 9.4E-03                                                       |     |         |
|                                                                         |                                                               | BT1329                                      | Putative thiol peroxidase                                                                             | -2.0   | 3.8E-03                                                       |     |         |
|                                                                         |                                                               | BT3971                                      | Glutathione peroxidase                                                                                | -2.1   | 4.0E-03                                                       |     |         |
|                                                                         |                                                               | <b>Energy production and conversion [C]</b> | 19 up-regulated (162)                                                                                 | BT4064 | NADH dehydrogenase I, chain H                                 | 3.7 | 2.2E-03 |
|                                                                         |                                                               |                                             |                                                                                                       | BT1159 | Na <sup>+</sup> -translocating NADH-quinone reductase subunit | 3.4 | 7.0E-03 |
|                                                                         |                                                               |                                             |                                                                                                       | BT4066 | NADH dehydrogenase I, chain B                                 | 3.0 | 5.7E-03 |
|                                                                         |                                                               |                                             |                                                                                                       | BT1157 | Na <sup>+</sup> -translocating NADH-quinone reductase subunit | 2.9 | 7.3E-03 |
| BT1160                                                                  | Na <sup>+</sup> -translocating NADH-quinone reductase subunit |                                             |                                                                                                       | 2.6    | 7.9E-04                                                       |     |         |
| BT1207                                                                  | Glycerate dehydrogenase (NADH-dependent)                      |                                             |                                                                                                       | 2.3    | 4.3E-03                                                       |     |         |
| BT1158                                                                  | Na <sup>+</sup> -translocating NADH-quinone reductase subunit |                                             |                                                                                                       | 2.1    | 9.7E-03                                                       |     |         |
|                                                                         |                                                               | BT0617                                      | Na <sup>+</sup> -transporting NADH:ubiquinone oxidoreductase, Electron transport complex protein rnfB | 2.0    | 2.5E-04                                                       |     |         |

|                             |                         |        |                                                                                                      |      |         |
|-----------------------------|-------------------------|--------|------------------------------------------------------------------------------------------------------|------|---------|
|                             |                         | BT0618 | Na <sup>+</sup> -transporting NADH:ubiquinone oxidoreductase, Electron transport complex protein mfc | 2.0  | 1.2E-03 |
|                             |                         | BT1155 | Na <sup>+</sup> -translocating NADH-quinone reductase subunit                                        | 1.9  | 5.8E-03 |
|                             |                         | BT4065 | NADH dehydrogenase I, chain D                                                                        | 1.8  | 3.7E-03 |
|                             |                         | BT1805 | Electron transfer flavoprotein alpha-subunit                                                         | 1.7  | 1.8E-04 |
|                             |                         | BT1696 | Oxaloacetate decarboxylase beta chain                                                                | 1.7  | 3.4E-04 |
|                             |                         | BT1747 | Pyruvate-flavodoxin oxidoreductase                                                                   | 1.6  | 1.2E-04 |
|                             |                         | BT0333 | Hypothetical protein                                                                                 | 1.6  | 1.1E-03 |
|                             |                         | BT1935 | Hypothetical protein                                                                                 | 1.5  | 4.7E-03 |
|                             |                         | BT0330 | Ketoisovalerate oxidoreductase subunit vorA                                                          | 1.5  | 7.4E-04 |
|                             |                         | BT1697 | Pyruvate carboxylase subunit B                                                                       | 1.4  | 1.5E-03 |
|                             |                         | BT1680 | Putative NADH dehydrogenase/NAD(P)H nitroreductase                                                   | 1.3  | 8.6E-03 |
|                             | 18 down-regulated (162) | BT1316 | Putative NADH dehydrogenase/NAD(P)H nitroreductase                                                   | -1.3 | 5.3E-03 |
|                             |                         | BT4445 | Hypothetical protein                                                                                 | -1.5 | 1.1E-03 |
|                             |                         | BT3162 | Glycerophosphoryl diester phosphodiesterase                                                          | -1.6 | 6.5E-03 |
|                             |                         | BT4359 | Alpha-N-acetylglucosaminidase precursor                                                              | -1.6 | 7.3E-03 |
|                             |                         | BT0309 | Dihydrolipoamide dehydrogenase                                                                       | -1.7 | 4.3E-03 |
|                             |                         | BT3411 | Pyrophosphate-energized vacuolar membrane proton pump                                                | -1.8 | 7.6E-03 |
|                             |                         | BT1210 | Cytochrome D ubiquinol oxidase subunit I                                                             | -1.8 | 6.3E-03 |
|                             |                         | BT0123 | NADH-ubiquinone oxidoreductase subunit                                                               | -1.8 | 5.0E-04 |
|                             |                         | BT0313 | Flavodoxin                                                                                           | -1.9 | 3.2E-03 |
|                             |                         | BT0442 | Glycerophosphoryl diester phosphodiesterase                                                          | -1.9 | 1.4E-04 |
|                             |                         | BT1006 | Putative nitroreductase                                                                              | -2.0 | 6.9E-03 |
|                             |                         | BT2071 | Isocitrate dehydrogenase [NADP]                                                                      | -2.0 | 7.9E-03 |
|                             |                         | BT2552 | Putative butyrate kinase                                                                             | -2.0 | 5.8E-04 |
|                             |                         | BT2551 | Phosphate butyryltransferase                                                                         | -2.1 | 1.2E-03 |
|                             |                         | BT2072 | Aconitate hydratase                                                                                  | -2.2 | 7.5E-03 |
|                             |                         | BT0787 | Succinyl-CoA synthetase alpha chain                                                                  | -2.8 | 5.6E-03 |
|                             |                         | BT0788 | Succinyl-CoA synthetase beta chain                                                                   | -2.8 | 7.9E-03 |
|                             |                         | BT1196 | Pyruvate carboxylase subunit B)                                                                      | -2.8 | 1.1E-03 |
| <b>Function unknown [S]</b> | 20 up-regulated (207)   | BT4390 | Hypothetical protein                                                                                 | 4.2  | 8.9E-03 |
|                             |                         | BT0874 | Hypothetical protein                                                                                 | 3.9  | 3.1E-03 |
|                             |                         | BT0974 | Conserved hypothetical protein, putative integral membrane protein                                   | 3.7  | 9.3E-03 |
|                             |                         | BT4389 | Hypothetical protein                                                                                 | 3.0  | 7.3E-03 |
|                             |                         | BT4561 | Conserved hypothetical protein, putative integral membrane protein                                   | 2.6  | 6.4E-04 |
|                             |                         | BT0627 | Conserved hypothetical protein, with a conserved domain of unknown function                          | 2.5  | 7.2E-03 |
|                             |                         | BT1755 | Putative exported 24-amino acid repeat protein                                                       | 2.4  | 1.9E-03 |
|                             |                         | BT4459 | Conserved hypothetical protein, putative transport protein                                           | 2.2  | 2.2E-03 |
|                             |                         | BT3250 | Hypothetical protein                                                                                 | 2.1  | 6.3E-03 |
|                             |                         | BT1949 | Hypothetical protein                                                                                 | 1.9  | 1.5E-03 |
|                             |                         | BT2008 | Hypothetical protein                                                                                 | 1.9  | 3.7E-03 |
|                             |                         | BT0579 | Putative transcription regulator                                                                     | 1.9  | 3.0E-03 |
|                             |                         | BT4316 | Hypothetical protein                                                                                 | 1.8  | 3.4E-03 |
|                             |                         | BT1521 | Hypothetical protein                                                                                 | 1.8  | 5.4E-03 |
|                             |                         | BT2139 | Hypothetical protein                                                                                 | 1.7  | 7.3E-05 |
|                             |                         | BT3251 | Conserved hypothetical protein, putative integral membrane protein                                   | 1.6  | 6.3E-03 |
|                             |                         | BT1208 | Hypothetical protein                                                                                 | 1.5  | 8.0E-03 |
|                             |                         | BT1678 | Hypothetical protein                                                                                 | 1.4  | 8.7E-03 |
|                             |                         | BT3378 | Hypothetical protein                                                                                 | 1.3  | 9.8E-03 |
|                             |                         | BT3647 | Hypothetical protein                                                                                 | 1.3  | 7.0E-03 |
|                             | 23 down-regulated (207) | BT2135 | Hypothetical protein                                                                                 | -1.3 | 6.2E-03 |
|                             |                         | BT4608 | Hypothetical protein                                                                                 | -1.4 | 4.2E-03 |
|                             |                         | BT1422 | Hypothetical protein                                                                                 | -1.4 | 8.1E-03 |
|                             |                         | BT2080 | Conserved hypothetical protein, putative inner membrane protein                                      | -1.4 | 7.1E-03 |
|                             |                         | BT3180 | Hypothetical protein                                                                                 | -1.4 | 4.7E-03 |
|                             |                         | BT0167 | Hypothetical protein                                                                                 | -1.5 | 9.8E-03 |
|                             |                         | BT1393 | 4-carboxymuconolactone decarboxylase                                                                 | -1.5 | 4.5E-03 |
|                             |                         | BT3536 | Hypothetical protein                                                                                 | -1.6 | 5.8E-03 |
|                             |                         | BT0447 | S-layer related protein precursor, sialic acid-specific 9-O-acetyltransferase                        | -1.6 | 1.8E-03 |
|                             |                         | BT1425 | Hypothetical protein                                                                                 | -1.6 | 3.7E-03 |

|                                                  |                         |        |                                                                            |      |         |
|--------------------------------------------------|-------------------------|--------|----------------------------------------------------------------------------|------|---------|
|                                                  |                         | BT3863 | Hypothetical protein                                                       | -1.6 | 2.5E-03 |
|                                                  |                         | BT3669 | Hypothetical protein                                                       | -1.7 | 2.1E-03 |
|                                                  |                         | BT2760 | Hypothetical protein                                                       | -1.7 | 2.1E-04 |
|                                                  |                         | BT4450 | Hypothetical protein                                                       | -1.7 | 1.6E-03 |
|                                                  |                         | BT4272 | Hypothetical protein                                                       | -1.8 | 9.1E-04 |
|                                                  |                         | BT0542 | Hypothetical protein                                                       | -1.8 | 2.0E-03 |
|                                                  |                         | BT3528 | Hypothetical protein                                                       | -1.8 | 2.8E-03 |
|                                                  |                         | BT4484 | Hypothetical protein                                                       | -1.8 | 5.1E-04 |
|                                                  |                         | BT4299 | Hypothetical protein                                                       | -1.9 | 8.3E-05 |
|                                                  |                         | BT2606 | Hypothetical protein                                                       | -1.9 | 2.0E-03 |
|                                                  |                         | BT0449 | Conserved hypothetical protein, putative S-layer related protein precursor | -2.1 | 4.9E-04 |
|                                                  |                         | BT4349 | Hypothetical protein                                                       | -2.4 | 3.9E-03 |
|                                                  |                         | BT0284 | Putative peptidoglycan binding protein (LPXTG motif)                       | -2.6 | 3.9E-03 |
| <b>Transcription [K]</b>                         | 7 up-regulated (231)    | BT3762 | Arginine repressor, transcriptional regulator of arginine metabolism       | 2.5  | 2.4E-04 |
|                                                  |                         | BT4366 | Putative transcription regulator                                           | 2.1  | 9.0E-03 |
|                                                  |                         | BT4591 | Putative nitrogen utilization substance protein                            | 2.1  | 6.1E-03 |
|                                                  |                         | BT2116 | Hypothetical protein                                                       | 1.7  | 3.1E-03 |
|                                                  |                         | BT3122 | Transcriptional regulator                                                  | 1.6  | 7.8E-03 |
|                                                  |                         | BT2340 | Hypothetical protein                                                       | 1.6  | 4.4E-03 |
|                                                  |                         | BT4534 | Hypothetical protein                                                       | 1.5  | 7.9E-03 |
|                                                  | 27 down-regulated (231) | BT0582 | Hypothetical protein                                                       | -1.3 | 9.9E-03 |
|                                                  |                         | BT1258 | Putative acetyltransferase                                                 | -1.3 | 2.7E-03 |
|                                                  |                         | BT1568 | Hypothetical protein                                                       | -1.4 | 7.1E-03 |
|                                                  |                         | BT1540 | Transcriptional regulator                                                  | -1.4 | 8.1E-03 |
|                                                  |                         | BT1963 | Putative transcriptional regulator                                         | -1.4 | 9.9E-03 |
|                                                  |                         | BT1404 | Putative transcriptional regulator                                         | -1.5 | 9.1E-03 |
|                                                  |                         | BT0583 | Hypothetical protein                                                       | -1.5 | 6.9E-03 |
|                                                  |                         | BT4402 | RNA polymerase ECF-type sigma factor                                       | -1.5 | 1.5E-03 |
|                                                  |                         | BT1797 | Putative transcriptional regulator                                         | -1.5 | 7.5E-04 |
|                                                  |                         | BT3899 | Transcriptional regulator                                                  | -1.5 | 9.1E-04 |
|                                                  |                         | BT1587 | Hypothetical protein                                                       | -1.6 | 8.7E-04 |
|                                                  |                         | BT4722 | RNA polymerase ECF-type sigma factor                                       | -1.6 | 1.8E-03 |
|                                                  |                         | BT2492 | RNA polymerase ECF-type sigma factor                                       | -1.6 | 2.7E-04 |
|                                                  |                         | BT0797 | Transcriptional regulator, ArsR family                                     | -1.6 | 2.4E-03 |
|                                                  |                         | BT3613 | LacI family transcriptional regulator                                      | -1.6 | 4.1E-03 |
|                                                  |                         | BT0824 | Transcriptional regulator (LacI family)                                    | -1.6 | 5.2E-04 |
|                                                  |                         | BT2463 | RNA polymerase ECF-type sigma factor                                       | -1.6 | 4.1E-03 |
|                                                  |                         | BT0636 | Putative transcriptional regulator                                         | -1.7 | 2.6E-03 |
|                                                  |                         | BT1078 | Putative transcriptional regulator                                         | -1.7 | 8.7E-03 |
|                                                  |                         | BT2435 | MarR family transcriptional regulator                                      | -1.7 | 3.1E-03 |
|                                                  |                         | BT2886 | Putative transcriptional regulator                                         | -1.7 | 3.5E-03 |
|                                                  |                         | BT4035 | Hypothetical protein                                                       | -1.9 | 5.1E-03 |
|                                                  |                         | BT2792 | AraC/XylS family transcriptional regulator                                 | -1.9 | 1.8E-03 |
|                                                  |                         | BT4696 | Hypothetical protein                                                       | -2.0 | 5.7E-04 |
|                                                  |                         | BT0433 | Putative xylose repressor                                                  | -2.0 | 7.9E-05 |
|                                                  |                         | BT4643 | RNA polymerase ECF-type sigma factor                                       | -2.1 | 4.9E-04 |
|                                                  |                         | BT4647 | RNA polymerase ECF-type sigma factor                                       | -2.4 | 3.0E-03 |
| <b>Carbohydrate transport and metabolism [G]</b> | 19 up-regulated (372)   | BT1765 | Levanase precursor (2,6-beta-D-fructofuranosidase)                         | 19.6 | 4.5E-03 |
|                                                  |                         | BT1758 | Glucose/galactose transporter                                              | 8.8  | 6.2E-03 |
|                                                  |                         | BT1759 | Levanase precursor (2,6-beta-D-fructofuranosidase)                         | 6.3  | 5.2E-03 |
|                                                  |                         | BT1527 | Hypothetical protein                                                       | 5.3  | 4.0E-03 |
|                                                  |                         | BT3419 | 2,3-bisphosphoglycerate-independent phosphoglycerate mutase                | 3.4  | 7.3E-03 |
|                                                  |                         | BT3773 | Hypothetical protein                                                       | 3.2  | 3.0E-03 |
|                                                  |                         | BT3082 | 2,6-beta-D-fructofuranosidase precursor                                    | 3.0  | 4.3E-03 |
|                                                  |                         | BT1872 | Periplasmic beta-galactosidase precursor                                   | 2.7  | 4.5E-03 |
|                                                  |                         | BT0307 | Phosphofructokinase                                                        | 2.5  | 5.0E-03 |
|                                                  |                         | BT2799 | Putative PfkB family carbohydrate kinase                                   | 2.4  | 8.5E-03 |
|                                                  |                         | BT1670 | Putative transmembrane transport protein                                   | 2.2  | 1.7E-03 |
|                                                  |                         | BT1672 | Phosphoglycerate kinase                                                    | 1.8  | 4.7E-03 |
|                                                  |                         | BT1883 | Putative alpha-1,6-mannanase                                               | 1.8  | 9.8E-03 |
|                                                  |                         | BT3929 | Triosephosphate isomerase                                                  | 1.8  | 3.6E-03 |
|                                                  |                         | BT4263 | Glyceraldehyde 3-phosphate dehydrogenase                                   | 1.7  | 8.1E-03 |
|                                                  |                         | BT1663 | Pullulanase precursor                                                      | 1.7  | 6.0E-03 |
|                                                  |                         | BT1228 | Fructose-1,6-bisphosphatase                                                | 1.6  | 6.0E-03 |
|                                                  |                         | BT3950 | Phosphoglucomutase/phosphomannomutase                                      | 1.4  | 5.0E-03 |

|                                            |                                                                        |                                                      |                                                           |                               |         |         |
|--------------------------------------------|------------------------------------------------------------------------|------------------------------------------------------|-----------------------------------------------------------|-------------------------------|---------|---------|
| 45 down-regulated (372)                    | BT4379                                                                 | Putative oxalate:formate antiporter                  | 1.4                                                       | 5.0E-03                       |         |         |
|                                            | BT4330                                                                 | Xanthosine permease                                  | -1.3                                                      | 8.0E-03                       |         |         |
|                                            | BT3094                                                                 | Putative secreted xylosidase                         | -1.4                                                      | 9.8E-03                       |         |         |
|                                            | BT0825                                                                 | Altronate oxidoreductase                             | -1.4                                                      | 7.9E-03                       |         |         |
|                                            | BT0443                                                                 | Thermostable beta-glucosidase B                      | -1.4                                                      | 6.0E-03                       |         |         |
|                                            | BT3231                                                                 | 4-deoxy-L-threo-5-hexosulose-uronate ketol-isomerase | -1.4                                                      | 5.6E-03                       |         |         |
|                                            | BT3774                                                                 | Alpha-mannosidase                                    | -1.4                                                      | 6.3E-03                       |         |         |
|                                            | BT3085                                                                 | Alpha-xylosidase                                     | -1.5                                                      | 5.9E-03                       |         |         |
|                                            | BT1780                                                                 | Periplasmic beta-glucosidase precursor               | -1.5                                                      | 4.8E-03                       |         |         |
|                                            | BT3299                                                                 | Alpha-glucosidase II                                 | -1.5                                                      | 2.2E-03                       |         |         |
|                                            | BT3659                                                                 | Alpha-xylosidase                                     | -1.5                                                      | 5.3E-03                       |         |         |
|                                            | BT0757                                                                 | Beta-galactosidase                                   | -1.5                                                      | 7.1E-03                       |         |         |
|                                            | BT2104                                                                 | ROK family member transcriptional repressor          | -1.5                                                      | 3.7E-03                       |         |         |
|                                            | BT0823                                                                 | Uronate isomerase                                    | -1.5                                                      | 8.0E-03                       |         |         |
|                                            | BT3132                                                                 | Sialic acid-specific 9-O-acetylerase                 | -1.5                                                      | 5.5E-03                       |         |         |
|                                            | BT4305                                                                 | Putative alpha-amylase                               | -1.5                                                      | 5.3E-03                       |         |         |
|                                            | BT1873                                                                 | Endo-arabinase                                       | -1.5                                                      | 5.1E-04                       |         |         |
|                                            | BT4423                                                                 | Xylulose kinase                                      | -1.5                                                      | 2.1E-03                       |         |         |
|                                            | BT0486                                                                 | Altronate hydrolase                                  | -1.6                                                      | 7.3E-03                       |         |         |
|                                            | BT2969                                                                 | Beta-galactosidase                                   | -1.6                                                      | 8.8E-03                       |         |         |
|                                            | BT4110                                                                 | Putative pectinesterase precursor                    | -1.6                                                      | 2.7E-03                       |         |         |
|                                            | BT3868                                                                 | Beta-N-hexosaminidase, glycosyl hyrolase family 20   | -1.6                                                      | 3.3E-03                       |         |         |
|                                            | BT3685                                                                 | Hypothetical protein                                 | -1.6                                                      | 3.7E-03                       |         |         |
|                                            | BT1625                                                                 | Hypothetical protein                                 | -1.7                                                      | 4.8E-03                       |         |         |
|                                            | BT2430                                                                 | Hexokinase type III                                  | -1.7                                                      | 1.8E-03                       |         |         |
|                                            | BT4091                                                                 | Sialic acid-specific 9-O-acetylerase                 | -1.7                                                      | 6.1E-03                       |         |         |
|                                            | BT4109                                                                 | Putative pectinesterase precursor                    | -1.7                                                      | 1.1E-03                       |         |         |
|                                            | BT4157                                                                 | Alpha-galactosidase precursor                        | -1.7                                                      | 8.9E-03                       |         |         |
|                                            | BT3173                                                                 | Hypothetical protein                                 | -1.7                                                      | 5.6E-03                       |         |         |
|                                            | BT0235                                                                 | Hypothetical protein                                 | -1.7                                                      | 8.7E-04                       |         |         |
|                                            | BT0996                                                                 | Beta-galactosidase                                   | -1.7                                                      | 5.0E-03                       |         |         |
|                                            | BT3527                                                                 | Alpha-1,2-mannosidase                                | -1.7                                                      | 2.5E-03                       |         |         |
|                                            | BT3529                                                                 | Aldose 1-epimerase precursor                         | -1.7                                                      | 5.7E-03                       |         |         |
|                                            | BT0487                                                                 | Transcriptional regulator                            | -1.7                                                      | 2.9E-04                       |         |         |
|                                            | BT4446                                                                 | Sugar phosphate isomerase/epimerase                  | -1.7                                                      | 5.4E-05                       |         |         |
|                                            | BT1626                                                                 | Beta-galactosidase                                   | -1.8                                                      | 5.2E-05                       |         |         |
|                                            | BT1778                                                                 | Beta-glucosidase (gentiobiase)                       | -1.8                                                      | 1.3E-03                       |         |         |
|                                            | BT3028                                                                 | Hypothetical protein                                 | -1.8                                                      | 6.9E-04                       |         |         |
|                                            | BT1013                                                                 | Putative alpha-rhamnosidase                          | -2.0                                                      | 1.5E-03                       |         |         |
|                                            | BT1764                                                                 | Hypothetical protein                                 | -2.0                                                      | 7.1E-03                       |         |         |
|                                            | BT0436                                                                 | Arabinose-proton symporter                           | -2.0                                                      | 1.1E-03                       |         |         |
|                                            | BT1658                                                                 | Transaldolase                                        | -2.1                                                      | 2.6E-03                       |         |         |
|                                            | BT4718                                                                 | Putative aquaporin                                   | -2.2                                                      | 1.5E-03                       |         |         |
|                                            | BT0453                                                                 | N-acylglucosamine 2-epimerase                        | -2.3                                                      | 2.3E-04                       |         |         |
|                                            | BT1986                                                                 | Putative ribose 5-phosphate isomerase                | -2.3                                                      | 3.3E-04                       |         |         |
| BT3673                                     | TonB                                                                   | -2.4                                                 | 2.4E-04                                                   |                               |         |         |
| Inorganic ion transport and metabolism [P] | 8 up-regulated (265)                                                   | BT2541                                               | Putative calcium-transporting ATPase                      | 3.5                           | 2.5E-03 |         |
|                                            |                                                                        | BT3944                                               | Putative chloride channel protein                         | 2.1                           | 7.4E-03 |         |
|                                            |                                                                        | BT4098                                               | Trk system K <sup>+</sup> uptake protein trkA             | 1.9                           | 1.5E-03 |         |
|                                            |                                                                        | BT0633                                               | Putative Na <sup>+</sup> /H <sup>+</sup> exchange protein | 1.9                           | 5.0E-03 |         |
|                                            |                                                                        | BT3248                                               | Putative metal ABC transporter, ATP-binding protein       | 1.8                           | 1.1E-03 |         |
|                                            |                                                                        | BT2099                                               | Fe <sup>3+</sup> ABC transporter, permease                | 1.7                           | 5.2E-03 |         |
|                                            |                                                                        | BT1736                                               | Chromate transport protein                                | 1.7                           | 3.1E-04 |         |
|                                            |                                                                        | BT1052                                               | Putative anti-sigma factor                                | 1.3                           | 9.6E-03 |         |
|                                            |                                                                        | 39 down-regulated (265)                              | BT2789                                                    | Chromate transport protein    | -1.4    | 7.0E-04 |
|                                            |                                                                        |                                                      | BT4665                                                    | K <sup>+</sup> uptake protein | -1.4    | 4.5E-03 |
| BT3670                                     | Putative outer membrane protein, probably involved in nutrient binding |                                                      | -1.4                                                      | 8.4E-03                       |         |         |
| BT1918                                     | Choline-sulfatase                                                      |                                                      | -1.4                                                      | 4.9E-03                       |         |         |
| BT4679                                     | Mg <sup>2+</sup> /Co <sup>2+</sup> transport protein                   |                                                      | -1.5                                                      | 5.1E-03                       |         |         |
| BT4635                                     | Putative anti-sigma factor                                             |                                                      | -1.5                                                      | 4.3E-03                       |         |         |
| BT4644                                     | Putative anti-sigma factor                                             |                                                      | -1.5                                                      | 4.6E-03                       |         |         |
| BT2626                                     | Putative outer membrane protein, probably involved in nutrient binding |                                                      | -1.5                                                      | 9.2E-03                       |         |         |
| BT3107                                     | Arylsulfatase (aryl-sulfate sulphohydrolase)                           |                                                      | -1.5                                                      | 7.2E-03                       |         |         |
| BT1373                                     | Ferritin A                                                             |                                                      | -1.5                                                      | 5.3E-03                       |         |         |
| BT3093                                     | Arylsulfatase (aryl-sulfate sulphohydrolase)                           |                                                      | -1.5                                                      | 2.8E-03                       |         |         |
| BT1876                                     | Putative anti-sigma factor                                             |                                                      | -1.5                                                      | 3.9E-03                       |         |         |



|                                           |                         |        |                                                                                                  |      |         |
|-------------------------------------------|-------------------------|--------|--------------------------------------------------------------------------------------------------|------|---------|
|                                           |                         | BT2511 | Putative transcription regulator                                                                 | -1.5 | 2.7E-03 |
|                                           |                         | BT3346 | Putative outer membrane protein, probably involved in nutrient binding                           | -1.5 | 5.0E-03 |
|                                           |                         | BT1624 | Putative secreted sulfatase                                                                      | -1.5 | 5.6E-03 |
|                                           |                         | BT2462 | Putative anti-sigma factor                                                                       | -1.5 | 6.5E-04 |
|                                           |                         | BT2914 | Iduronate 2-sulfatase precursor                                                                  | -1.5 | 3.0E-04 |
|                                           |                         | BT1279 | Putative anti-sigma factor                                                                       | -1.6 | 9.3E-03 |
|                                           |                         | BT2560 | Putative outer membrane protein, probably involved in nutrient binding                           | -1.6 | 1.1E-03 |
|                                           |                         | BT2512 | Cation-transporting ATPase, P-type, putative zinc-transporting ATPase                            | -1.7 | 2.8E-03 |
|                                           |                         | BT4081 | Putative outer membrane protein, probably involved in nutrient binding                           | -1.7 | 9.4E-03 |
|                                           |                         | BT1046 | Putative outer membrane protein, probably involved in nutrient binding                           | -1.7 | 6.3E-03 |
|                                           |                         | BT3518 | Putative anti-sigma factor                                                                       | -1.7 | 1.2E-03 |
|                                           |                         | BT0756 | Iduronate 2-sulfatase precursor                                                                  | -1.7 | 1.8E-03 |
|                                           |                         | BT3788 | Putative outer membrane protein, probably involved in nutrient binding                           | -1.7 | 4.4E-04 |
|                                           |                         | BT3749 | Putative anti-sigma factor                                                                       | -1.9 | 6.1E-04 |
|                                           |                         | BT1875 | Putative outer membrane protein, probably involved in nutrient binding                           | -1.9 | 3.7E-04 |
|                                           |                         | BT2019 | Polyphosphate kinase                                                                             | -1.9 | 2.1E-03 |
|                                           |                         | BT0268 | Putative outer membrane protein, probably involved in nutrient binding                           | -2.0 | 1.2E-03 |
|                                           |                         | BT0439 | Putative outer membrane protein, probably involved in nutrient binding                           | -2.0 | 7.8E-03 |
|                                           |                         | BT1683 | Putative outer membrane protein, probably involved in nutrient binding                           | -2.0 | 1.1E-03 |
|                                           |                         | BT3176 | Hypothetical protein                                                                             | -2.1 | 2.7E-04 |
|                                           |                         | BT1109 | Ferritin A                                                                                       | -2.1 | 5.7E-03 |
|                                           |                         | BT4248 | Putative anti-sigma factor                                                                       | -2.1 | 1.7E-03 |
|                                           |                         | BT0452 | Putative outer membrane protein, probably involved in nutrient binding                           | -2.4 | 5.8E-05 |
|                                           |                         | BT4247 | Putative outer membrane protein, probably involved in nutrient binding                           | -2.5 | 3.0E-03 |
|                                           |                         | BT2461 | Putative outer membrane protein, probably involved in nutrient binding                           | -2.7 | 2.5E-05 |
|                                           |                         | BT0317 | Putative outer membrane protein, probably involved in nutrient binding                           | -2.7 | 2.8E-04 |
|                                           |                         | BT0483 | Putative outer membrane protein, probably involved in nutrient binding                           | -2.7 | 1.3E-04 |
| <b>Signal transduction mechanisms [T]</b> | 3 up-regulated (161)    | BT4218 | Phosphate starvation-inducible protein, PhoH                                                     | 2.0  | 3.7E-03 |
|                                           |                         | BT3805 | Two-component system sensor histidine kinase                                                     | 1.8  | 3.1E-03 |
|                                           |                         | BT3154 | Hypothetical protein                                                                             | 1.7  | 1.7E-04 |
|                                           | 26 down-regulated (161) | BT0729 | Transcriptional regulator                                                                        | -1.3 | 5.3E-03 |
|                                           |                         | BT1123 | Transcriptional regulator                                                                        | -1.3 | 6.5E-03 |
|                                           |                         | BT3786 | Two-component system sensor histidine kinase/response regulator, hybrid ('one-component system') | -1.4 | 4.7E-03 |
|                                           |                         | BT2750 | Putative protein-tyrosine-phosphatase                                                            | -1.4 | 5.7E-03 |
|                                           |                         | BT0688 | CAMP-binding domain (catabolite gene activator) transcriptional regulator                        | -1.5 | 8.5E-03 |
|                                           |                         | BT1482 | Two-component system response regulator                                                          | -1.5 | 1.7E-03 |
|                                           |                         | BT1117 | Conserved hypothetical protein, with a cAMP-binding domain                                       | -1.5 | 3.5E-03 |
|                                           |                         | BT2574 | Two-component system sensor histidine kinase                                                     | -1.5 | 3.8E-03 |
|                                           |                         | BT2923 | Two-component system sensor histidine kinase/response regulator, hybrid ('one-component system') | -1.5 | 2.6E-03 |
|                                           |                         | BT0989 | Two-component system sensor histidine kinase                                                     | -1.5 | 7.6E-03 |
|                                           |                         | BT1483 | Two-component system sensor histidine kinase                                                     | -1.6 | 1.2E-04 |
|                                           |                         | BT3172 | Two-component system sensor histidine kinase/response regulator, hybrid ('one-component system') | -1.6 | 9.7E-04 |
|                                           |                         | BT0732 | Two-component system response regulator                                                          | -1.6 | 4.3E-03 |
|                                           |                         | BT0990 | Two-component system response regulator                                                          | -1.6 | 2.7E-03 |
|                                           |                         | BT1318 | Signaling protein without kinase domain                                                          | -1.6 | 6.8E-03 |
|                                           |                         | BT0324 | Hypothetical protein                                                                             | -1.6 | 9.1E-03 |
|                                           |                         | BT3645 | Two-component system sensor histidine kinase                                                     | -1.6 | 6.5E-03 |
|                                           |                         | BT1183 | Two-component system sensor histidine kinase/response regulator, hybrid ('one component system') | -1.7 | 6.7E-03 |

|  |        |                                                                                                  |      |         |
|--|--------|--------------------------------------------------------------------------------------------------|------|---------|
|  | BT1802 | Two-component system sensor histidine kinase                                                     | -1.7 | 1.7E-03 |
|  | BT4182 | Two-component system sensor histidine kinase/response regulator, hybrid ('one-component system') | -1.8 | 6.2E-03 |
|  | BT4354 | Two-component system sensor histidine kinase                                                     | -1.8 | 5.9E-04 |
|  | BT2204 | Hypothetical protein                                                                             | -1.9 | 1.3E-03 |
|  | BT1810 | GAF domain-containing protein, involved in signal transduction                                   | -1.9 | 1.2E-03 |
|  | BT0901 | Putative universal stress protein UspA                                                           | -2.0 | 5.6E-03 |
|  | BT2628 | Two-component system sensor histidine kinase/response regulator, hybrid ('one-component system') | -2.2 | 5.1E-04 |
|  | BT1334 | PhoH-like protein                                                                                | -2.3 | 2.1E-04 |

\* - number in parentheses refers to the total number of genes in the *B. thetaiotaomicron* genome belonging to the COG
