# Supplementary material
Source: PubMed Central journal article supplement (PMC1502497)
Supplement: pnas_0602187103_6.pdf [file pnas_0602187103_6.pdf]

**Table 2. *B. thetaiotaomicron* glycoside hydrolase and polysaccharide lyase genes regulated by the presence of *M. smithii* in vivo**

| CAZy Group                                       | % of Group* | Gene ID | Annotation**                                        | GeneChip        |          |
|--------------------------------------------------|-------------|---------|-----------------------------------------------------|-----------------|----------|
|                                                  |             |         |                                                     | Fold difference | P value  |
| <b>Up-regulated genes (Bt/Ms vs. Bt alone)</b>   |             |         |                                                     |                 |          |
| Glycoside Hydrolase Family 32                    | 75          | BT1765  | Levanase precursor (2,6-beta-D-fructofuranosidase)  | 7.6             | 4.51E-03 |
|                                                  |             | BT1759  | Levanase precursor (2,6-beta-D-fructofuranosidase)  | 6.3             | 5.24E-03 |
|                                                  |             | BT3082  | 2,6-beta-D-fructofuranosidase precursor             | 5.4             | 4.34E-03 |
| Glycoside Hydrolase Family 13                    | 10          | BT1663  | Pullulanase precursor                               | 4.8             | 6.03E-03 |
| Glycoside Hydrolase Family 2                     | 3           | BT4667  | Beta-galactosidase                                  | 3.4             | 2.68E-02 |
| Glycoside Hydrolase Family 23                    | 33          | BT3999  | Lytic murein transglycosylase D precursor           | 4.0             | 1.67E-02 |
| Glycoside Hydrolase Family 3                     | 20          | BT1872  | Periplasmic beta-glucosidase precursor              | 5.9             | 4.49E-03 |
|                                                  |             | BT2439  | Beta-N-acetylglucosaminidase                        | 2.6             | 3.50E-02 |
| Glycoside Hydrolase Family 76                    | 10          | BT1883  | Putative alpha-1,6-mannanase                        | 3.7             | 9.75E-03 |
| Glycoside Hydrolase Family 88                    | 25          | BT4658  | Glucuronyl hydrolase                                | 2.5             | 4.30E-02 |
| Glycoside Hydrolase Family 95                    | 20          | BT4682  | Conserved hypothetical protein                      | 2.5             | 4.51E-02 |
| Glycoside Hydrolase Family 97                    | 20          | BT1871  | Putative alpha-glucosidase                          | 4.8             | 9.99E-03 |
|                                                  |             | BT3664  | Putative alpha-glucosidase                          | 4.4             | 7.54E-03 |
| <b>Down-regulated genes (Bt/Ms vs. Bt alone)</b> |             |         |                                                     |                 |          |
| Glycoside Hydrolase Family 2                     | 18          | BT1626  | Beta-galactosidase                                  | -10.5           | 5.20E-05 |
|                                                  |             | BT3292  | Beta-glucuronidase                                  | -4.6            | 6.12E-03 |
|                                                  |             | BT0757  | Beta-galactosidase                                  | -4.4            | 7.07E-03 |
|                                                  |             | BT0996  | Beta-galactosidase                                  | -4.2            | 5.04E-03 |
|                                                  |             | BT2969  | Beta-galactosidase                                  | -3.7            | 8.80E-03 |
|                                                  |             | BT2432  | Beta-mannosidase precursor                          | -3.3            | 1.85E-02 |
| Glycoside Hydrolase Family 3                     | 30          | BT1778  | Beta-glucosidase (gentiobiase)                      | -5.2            | 1.32E-03 |
|                                                  |             | BT1780  | Periplasmic beta-glucosidase precursor              | -4.2            | 4.77E-03 |
| Glycoside Hydrolase Family 18                    | 29          | BT1048  | Putative secreted endoglycosidase                   | -3.2            | 1.72E-02 |
|                                                  |             | BT2825  | Chitinase                                           | -2.8            | 3.52E-02 |
| Glycoside Hydrolase Family 20                    | 40          | BT3868  | Beta-N-hexosaminidase, glycosyl hydrolase family 20 | -4.5            | 3.33E-03 |
|                                                  |             | BT4337  | Beta-hexosaminidase precursor                       | -4.0            | 1.28E-02 |
|                                                  |             | BT0459  | Beta-hexosaminidase precursor                       | -3.7            | 1.15E-02 |
|                                                  |             | BT1621  | Beta-hexosaminidase precursor                       | -3.5            | 1.57E-02 |
|                                                  |             | BT4394  | Beta-hexosaminidase precursor                       | -3.2            | 2.57E-02 |
|                                                  |             | BT1051  | Beta-hexosaminidase precursor                       | -3.0            | 2.98E-02 |
| Glycoside Hydrolase Family 27                    | 60          | BT3592  | Alpha-galactosidase precursor                       | -5.5            | 4.80E-03 |
|                                                  |             | BT3065  | Alpha-galactosidase precursor                       | -5.1            | 5.53E-03 |
|                                                  |             | BT4157  | Alpha-galactosidase precursor                       | -3.7            | 8.93E-03 |
| Glycoside Hydrolase Family 28                    | 33          | BT4153  | Exopolygalacturonase precursor                      | -5.4            | 2.87E-03 |
|                                                  |             | BT1018  | Polygalacturonase (Pectinase)                       | -2.6            | 3.60E-02 |
|                                                  |             | BT0127  | Putative transmembrane protein                      | -2.5            | 4.57E-02 |
| Glycoside Hydrolase Family 29                    | 44          | BT3798  | Conserved hypothetical protein                      | -4.4            | 3.00E-03 |
|                                                  |             | BT1842  | Alpha-L-fucosidase precursor                        | -3.0            | 2.52E-02 |
|                                                  |             | BT2192  | Conserved hypothetical protein                      | -2.9            | 2.32E-02 |
|                                                  |             | BT3956  | Conserved hypothetical protein                      | -2.9            | 3.00E-02 |
| Glycoside Hydrolase Family 30                    | 50          | BT3026  | Glycosylhydrolase, putative xylanase                | -4.7            | 2.30E-03 |
| Glycoside Hydrolase Family 31                    | 50          | BT3299  | Alpha-glucosidase II                                | -5.1            | 2.16E-03 |
|                                                  |             | BT3085  | Alpha-xylosidase                                    | -4.0            | 5.91E-03 |
|                                                  |             | BT3659  | Alpha-xylosidase                                    | -4.0            | 5.31E-03 |
| Glycoside Hydrolase Family 36                    | 33          | BT2851  | Alpha-galactosidase (melibiase)                     | -3.5            | 1.27E-02 |

|                                       |     |        |                                                  |      |          |
|---------------------------------------|-----|--------|--------------------------------------------------|------|----------|
| Glycoside Hydrolase Family 43         | 23  | BT1873 | Endo-arabinase                                   | -6.4 | 5.10E-04 |
|                                       |     | BT3467 | Putative glycosylhydrolase                       | -6.1 | 8.25E-04 |
|                                       |     | BT3685 | Conserved hypothetical protein                   | -4.4 | 3.75E-03 |
|                                       |     | BT3094 | Putative secreted xylosidase                     | -3.9 | 9.76E-03 |
|                                       |     | BT0360 | Putative arabinan endo-1,5-alpha-L-arabinosidase | -3.2 | 2.49E-02 |
|                                       |     | BT3108 | Putative beta-xylosidase                         | -2.8 | 2.75E-02 |
|                                       |     | BT4185 | Xylosidase/arabinosidase                         | -2.5 | 4.58E-02 |
| Glycoside Hydrolase Family 57         | 100 | BT4305 | Putative alpha-amylase                           | -4.1 | 5.28E-03 |
| Glycoside Hydrolase Family 66         | 100 | BT3087 | Cycloisomaltooligosaccharide glucanotransferase  | -2.7 | 3.89E-02 |
| Glycoside Hydrolase Family 67         | 100 | BT2622 | Alpha-glucuronidase                              | -3.1 | 1.86E-02 |
| Glycoside Hydrolase Family 76         | 20  | BT3521 | Alpha-1,6-mannanase                              | -3.2 | 1.62E-02 |
|                                       |     | BT2631 | Putative hydrolase                               | -2.4 | 4.99E-02 |
| Glycoside Hydrolase Family 78         | 67  | BT1013 | Putative alpha-rhamnosidase                      | -5.7 | 1.55E-03 |
|                                       |     | BT1019 | Putative secreted hydrolase                      | -4.0 | 6.00E-03 |
|                                       |     | BT4076 | Alpha-rhamnosidase                               | -3.1 | 1.93E-02 |
|                                       |     | BT2523 | Alpha-rhamnosidase                               | -2.5 | 3.99E-02 |
| Glycoside Hydrolase Family 88         | 50  | BT2913 | Unsaturated glucuronylhydrolase                  | -4.6 | 2.72E-03 |
|                                       |     | BT3348 | Putative unsaturated glucuronyl hydrolase        | -4.2 | 4.30E-03 |
| Glycoside Hydrolase Family 89         | 67  | BT0438 | Alpha-N-acetylglucosaminidase precursor          | -4.4 | 5.23E-03 |
|                                       |     | BT4359 | Alpha-N-acetylglucosaminidase precursor          | -3.9 | 7.28E-03 |
| Glycoside Hydrolase Family 92         | 39  | BT3527 | Alpha-1,2-mannosidase                            | -4.6 | 2.53E-03 |
|                                       |     | BT3991 | Putative alpha-1,2-mannosidase                   | -3.4 | 1.11E-02 |
|                                       |     | BT3130 | Conserved hypothetical protein                   | -3.2 | 2.83E-02 |
|                                       |     | BT4092 | Putative alpha-1,2-mannosidase                   | -3.1 | 1.71E-02 |
|                                       |     | BT3530 | Putative alpha-1,2-mannosidase                   | -2.8 | 3.27E-02 |
|                                       |     | BT1878 | Conserved hypothetical protein                   | -2.7 | 3.00E-02 |
|                                       |     | BT2629 | Putative alpha-1,2-mannosidase                   | -2.7 | 3.03E-02 |
|                                       |     | BT3994 | Putative alpha-1,2-mannosidase                   | -2.5 | 4.11E-02 |
|                                       |     | BT3965 | Conserved hypothetical protein                   | -2.4 | 4.54E-02 |
| Glycoside Hydrolase Family 95         | 40  | BT3173 | Conserved hypothetical protein                   | -4.1 | 5.57E-03 |
|                                       |     | BT1010 | Conserved hypothetical protein                   | -3.2 | 1.65E-02 |
| Glycoside Hydrolase Family 97         | 20  | BT3163 | Alpha-glucosidase, putative                      | -4.3 | 3.37E-03 |
|                                       |     | BT4581 | Alpha-glucosidase                                | -3.0 | 2.11E-02 |
| Polysaccharide Lyase Family 1         | 20  | BT4119 | Conserved hypothetical protein                   | -3.2 | 1.59E-02 |
| Polysaccharide Lyase Family 9         | 50  | BT4170 | Putative pectate lyase L precursor               | -4.3 | 3.51E-03 |
| Carbohydrate-Binding Module Family 32 | 33  | BT1625 | Conserved hypothetical protein                   | -4.8 | 4.76E-03 |
|                                       |     | BT3774 | Alpha-mannosidase                                | -3.9 | 6.26E-03 |
|                                       |     | BT3293 | Beta-galactosidase                               | -3.7 | 1.21E-02 |
|                                       |     | BT3169 | Alpha-xylosidase                                 | -3.2 | 2.80E-02 |

\* - percent of all *B. thetaiotaomicron* glycoside hydrolases belonging to the Carbohydrate Active Enzymes (CAZy) family

\*\* - according to *B. thetaiotaomicron* genome annotation
